# Supplementary material for: Bioconversion of Biologically Active Indole Derivatives with Indole-3-Acetic Acid-Degrading Enzymes from Caballeronia glathei DSM50014
Source: Biomolecules. 2020 Apr 24;10(4):663. doi: 10.3390/biom10040663 (PMC7225977; doi:10.3390/biom10040663)
Supplement: Supplementary file 1 [file biomolecules-10-00663-s001.pdf]

## Supplementary Material for

# Bioconversion of Biologically Active Indole Derivatives with Indole-3-Acetic Acid-Degrading Enzymes from *Caballeronia glathei* DSM50014

Mikas Sadauskas \*, Roberta Statkevičiūtė, Justas Vaitekūnas and Rolandas Meškys.

Department of Molecular Microbiology and Biotechnology, Institute of Biochemistry, Life Sciences Center, Vilnius University, Saulėtekio al. 7, Vilnius, LT-10257, Lithuania; roberta.statkeviciute@gmc.stud.vu.lt (R.S.), justas.vaitekunas@bchi.vu.lt (J.V.), rolandas.meskys@bchi.vu.lt (R.M.)

\* Correspondence: mikas.sadauskas@bchi.vu.lt; Tel.: +37062230055

**Table S1.** Oligonucleotides used in this study. Recognition sequences of restriction endonucleases are underlined.

| Oligonucleotide    | Oligonucleotide Sequence            |
|--------------------|-------------------------------------|
| glathei-iacA-Nde-F | 5'-CATATGTCGCAACCGCCCTCGC-3'        |
| glathei-iacA-Xho-R | 5'-CTCGAGTTAGAGATAGCCCGGAATCG-3'    |
| iacE-Nde-F         | 5'-CGCATATGTGCTGCACAGCATC-3'        |
| iacE-Xho-R         | 5'-CTCGAGTCAGCGCATGTAGAGGC-3'       |
| iacB2-Nde-F        | 5'-CAACATATGAGCCAGACAACAACCTTACG-3' |
| iacB2-Xho-R        | 5'-CTCGAGTTACTGAATAATCAGTTCTCGAC-3' |

**Table S2.** Characteristics of bacterial strains used in this study.

| Strain                               | Characteristics                               | Source           |
|--------------------------------------|-----------------------------------------------|------------------|
| <i>Escherichia coli</i> DH5α         | Host for cloning and plasmid isolation        | Novagen, Germany |
| <i>Escherichia coli</i> BL21 (DE3)   | Host for protein expression and bioconversion | Novagen, Germany |
| <i>Caballeronia glathei</i> DSM50014 | Degrader of indole-3-acetic acid              | DSMZ, Germany    |
| <i>Acinetobacter</i> sp. O153        | Degrader of indole                            | [41]             |

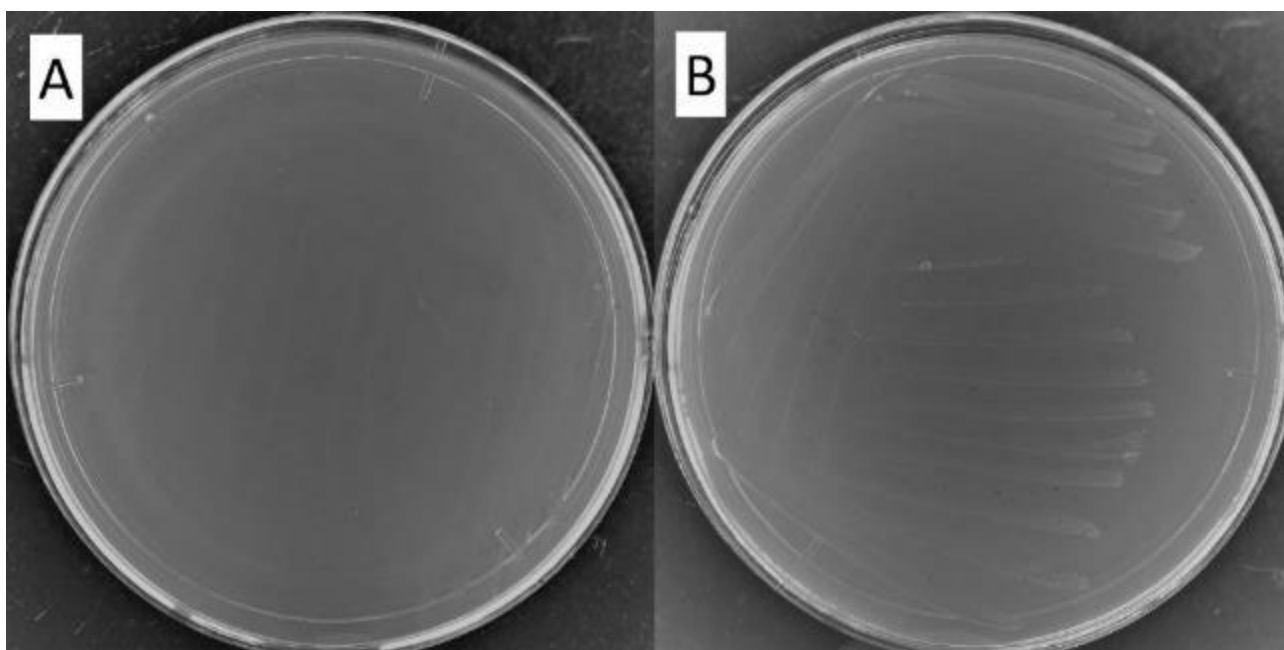

**Figure S1.** Growth of *Caballeronia glathei* DSM50014 on M9 minimal medium (A) and M9 medium supplemented with 1 mM IAA (B).

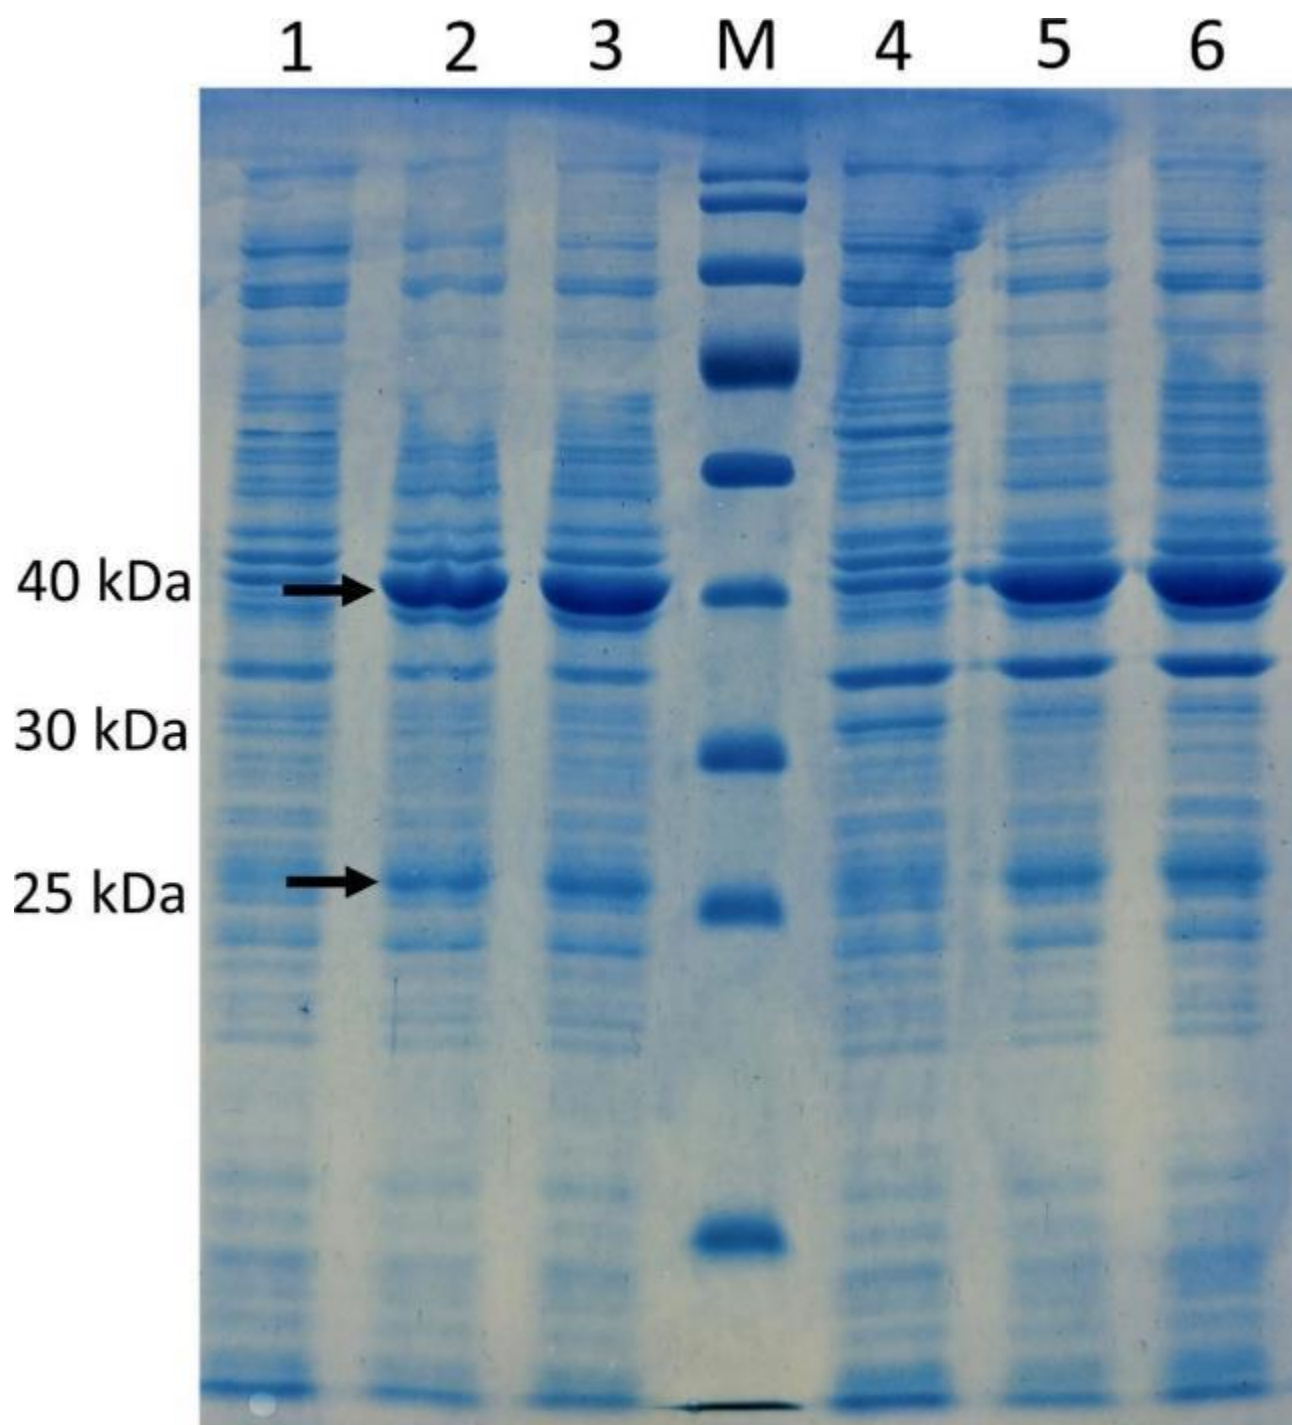

**Figure S2.** SDS-PAGE of IacA and IacE co-expression in *E. coli*. 1—soluble fraction of *E. coli* BL21 (DE3) cells with no plasmid, 2—cell lysate of *E. coli* BL21 (DE3) cells incubated at 16 °C and co-expressing IacA and IacE, 3—soluble fraction of *E. coli* BL21 (DE3) cells incubated at 30 °C and co-expressing IacA and IacE, 4—soluble fraction of *E. coli* BL21 (DE3) cells with no plasmid, 5—soluble fraction of *E. coli* BL21 (DE3) cells incubated at 16 °C and co-expressing IacA and IacE, 6—soluble fraction of *E. coli* BL21 (DE3) cells incubated at 30 °C and co-expressing IacA and IacE, M—PageRuler Prestained Protein Ladder (ThermoFisher Scientific). Arrows indicate the bands of the IacA and IacE proteins.

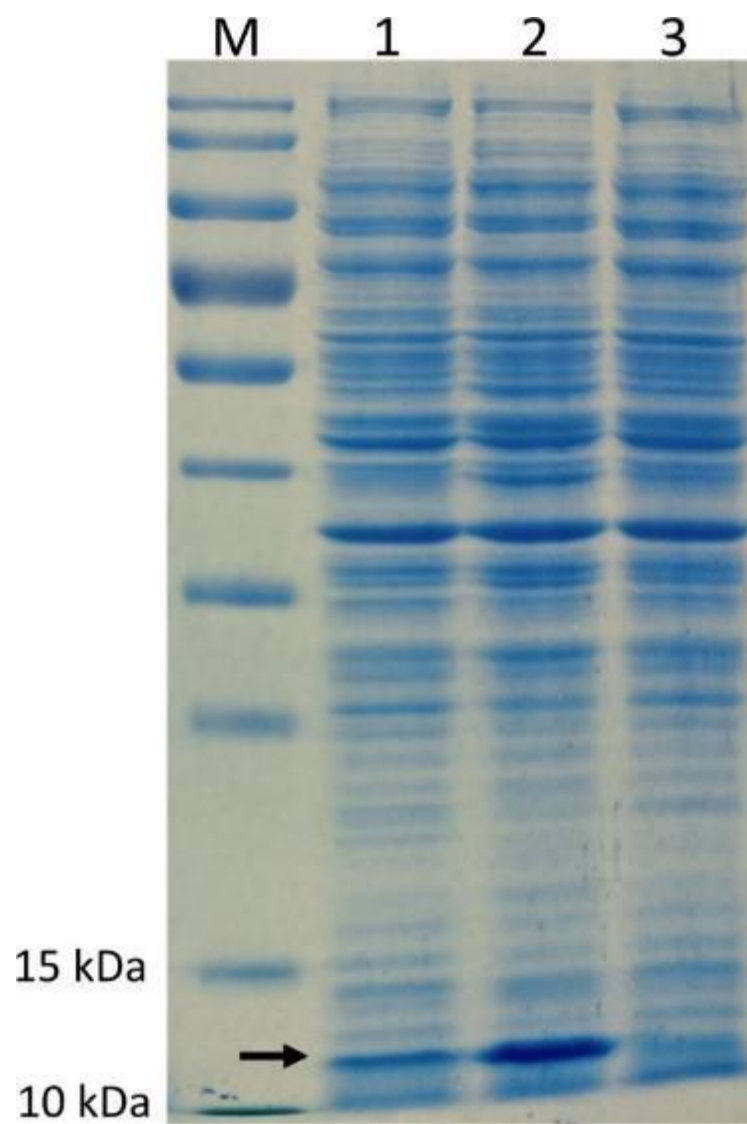

**Figure S3.** SDS-PAGE of IacB expressed in *E. coli*. 1—soluble fraction of *E. coli* BL21 (DE3) cells incubated at 16 °C and expressing IacB , 2—soluble fraction of *E. coli* BL21 (DE3) cells incubated at 30 °C and expressing IacB, 3—soluble fraction of *E. coli* BL21 (DE3) cells with no plasmid, M—PageRuler Prestained Protein Ladder (ThermoFisher Scientific). Arrow indicates the bands of IacB protein.

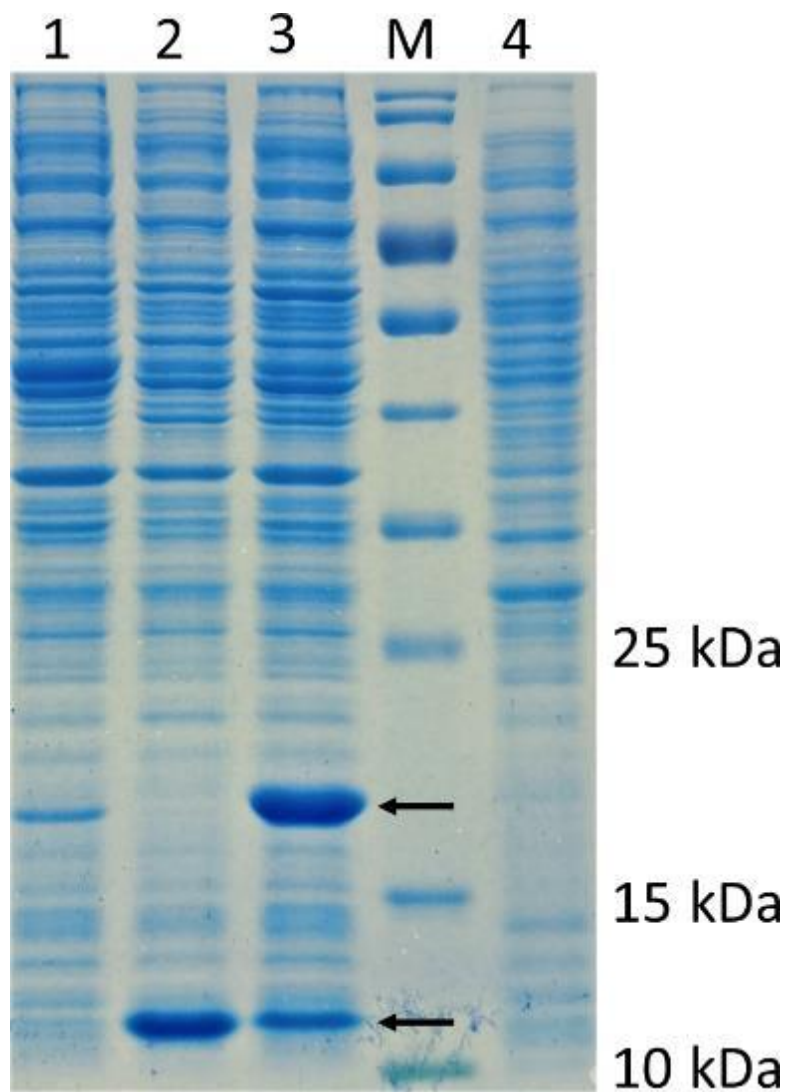

**Figure S4.** SDS-PAGE of LacB and LacI expressed in *E. coli*. 1 – soluble fraction of *E. coli* BL21 (DE3) cells expressing LacI, 2—soluble fraction of *E. coli* BL21 (DE3) cells expressing LacB, 3—soluble fraction of *E. coli* BL21 (DE3) co-expressing LacB and LacI, 4—soluble fraction of *E. coli* BL21 (DE3) cells with no plasmid, M—PageRuler Prestained Protein Ladder (ThermoFisher Scientific). Arrows indicate the bands of LacB and LacI proteins.

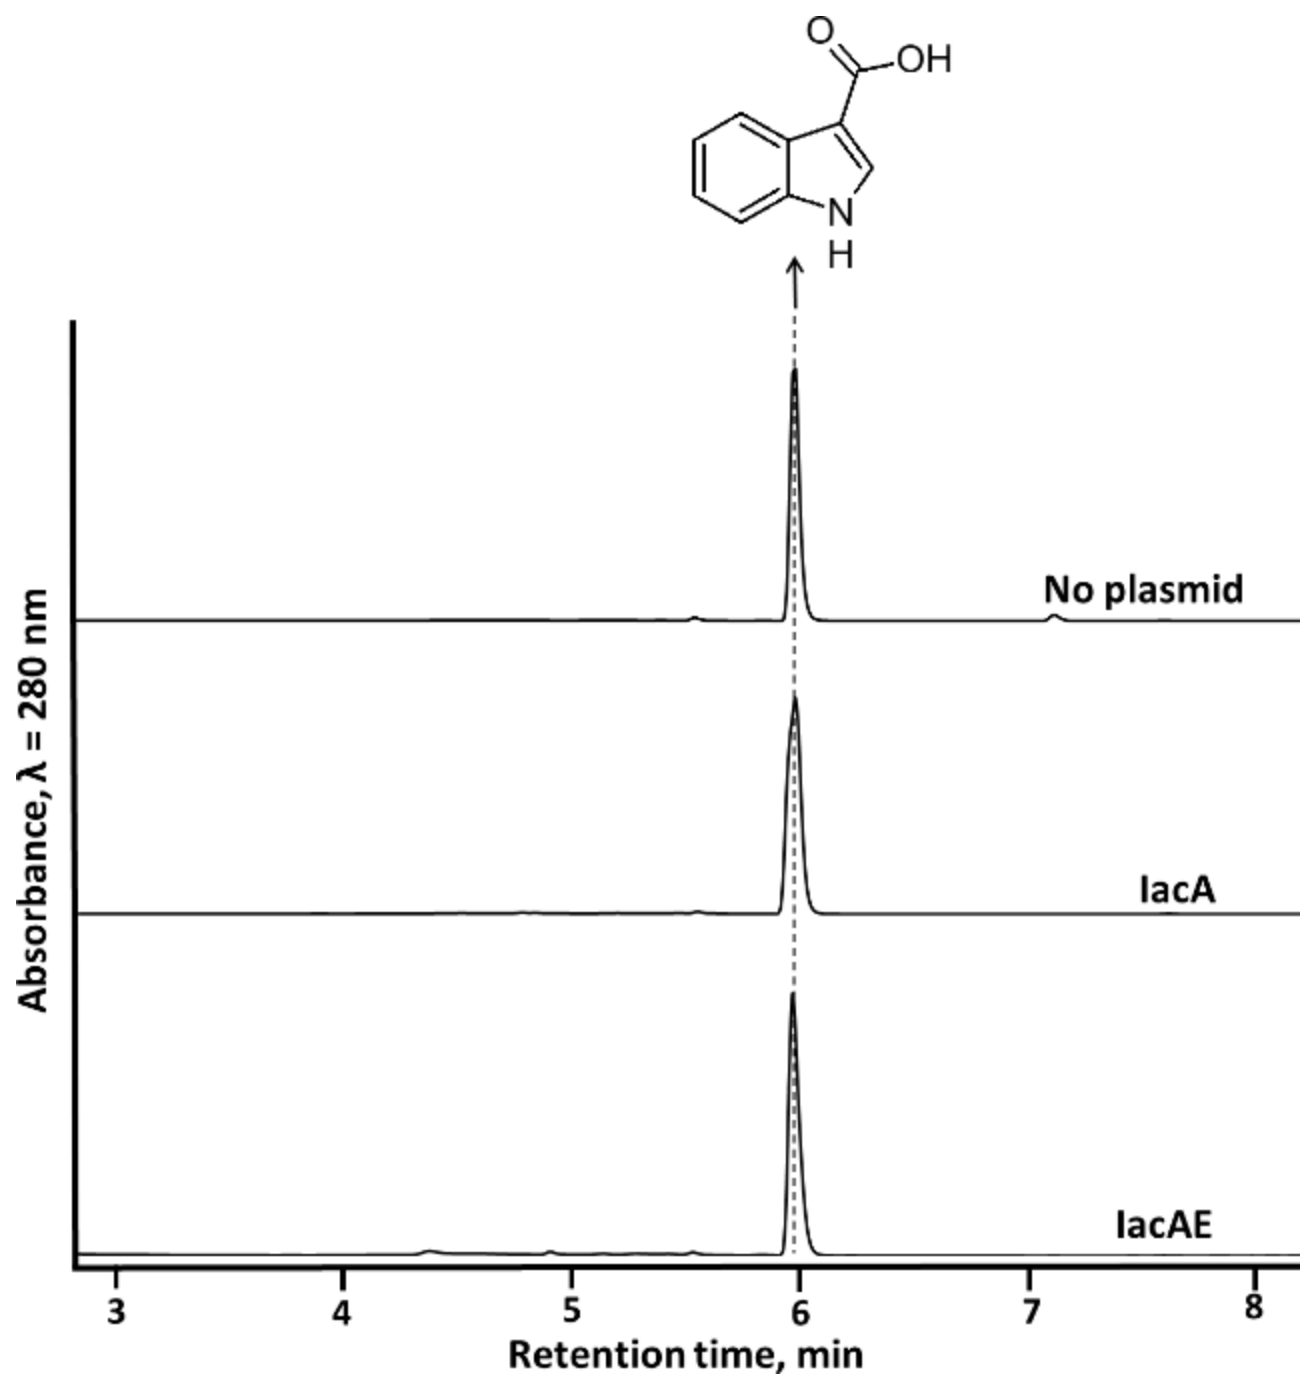

**Figure S5.** HPLC chromatograms of bioconversion products obtained by using *E. coli* cells expressing different combinations of IacA and IacE proteins and indole-3-carboxylic acid as substrate.

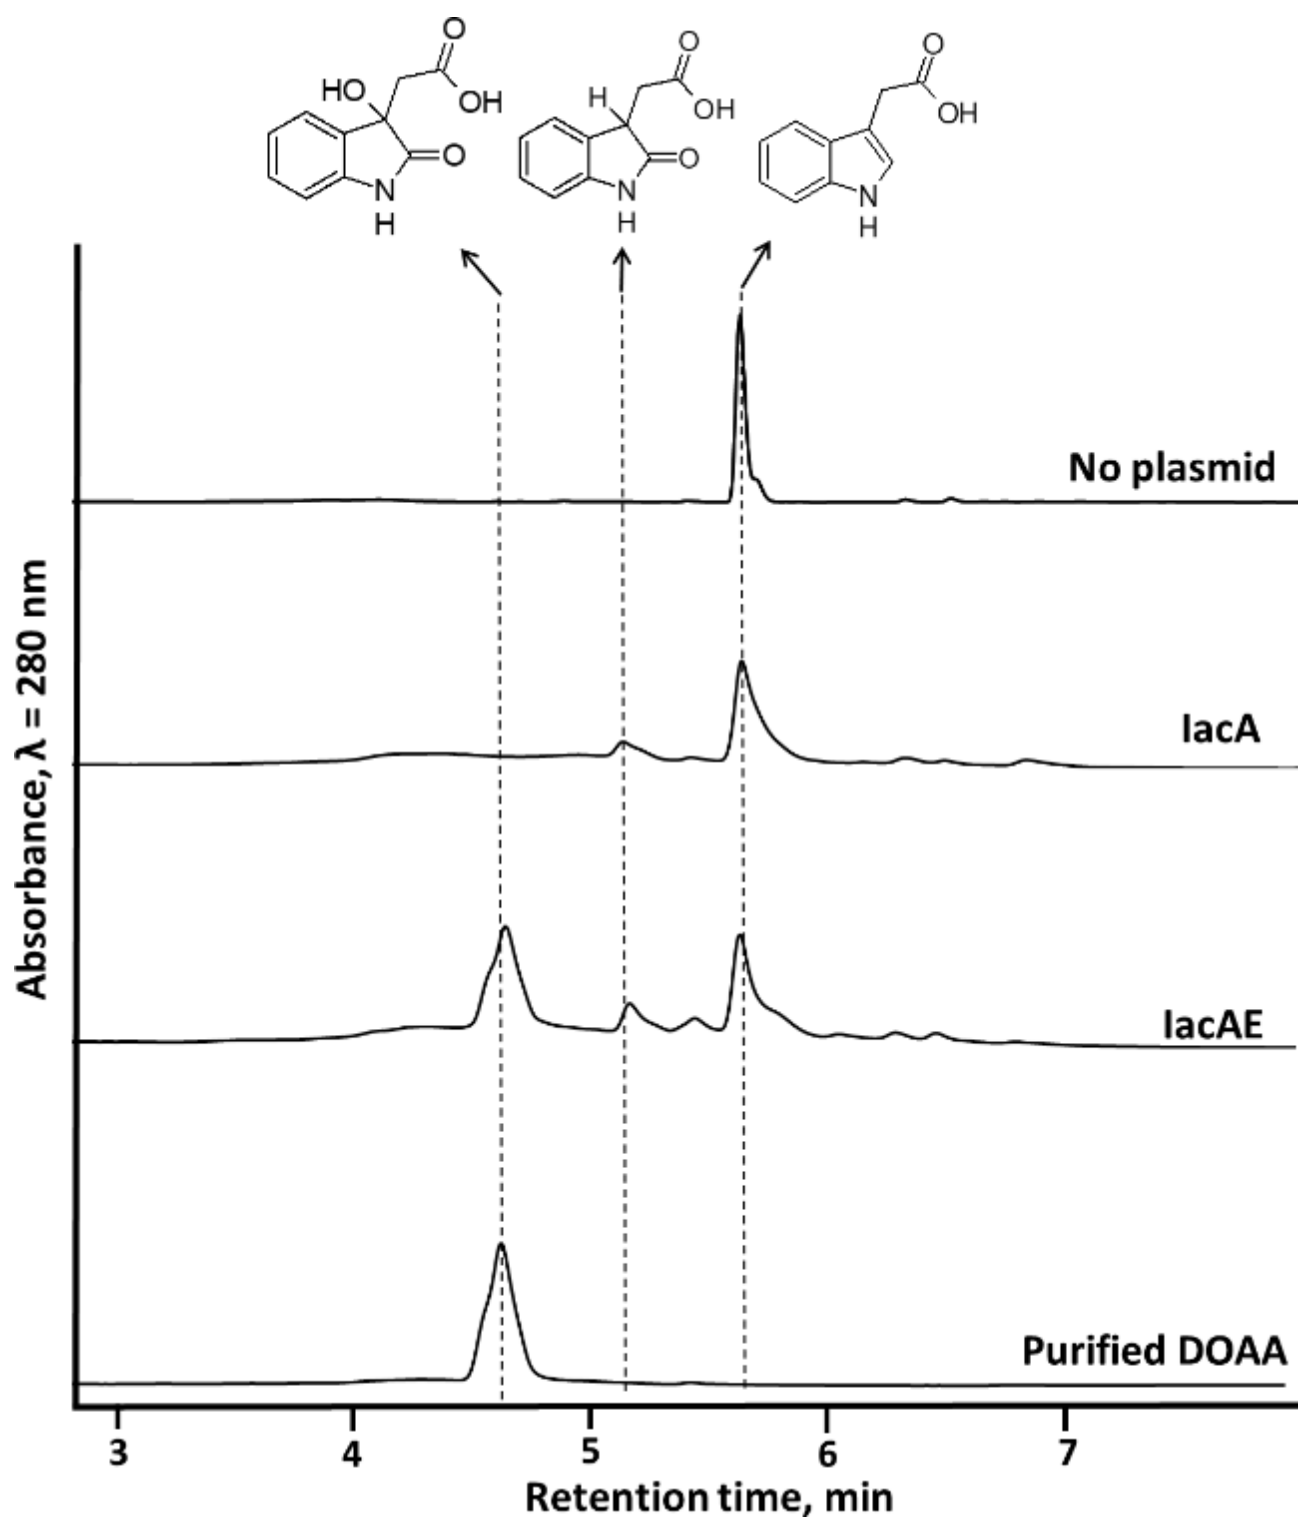

**Figure S6.** HPLC chromatograms of bioconversion products obtained by using *E. coli* cells expressing different combinations of IacA and IacE proteins and IAA as substrate.

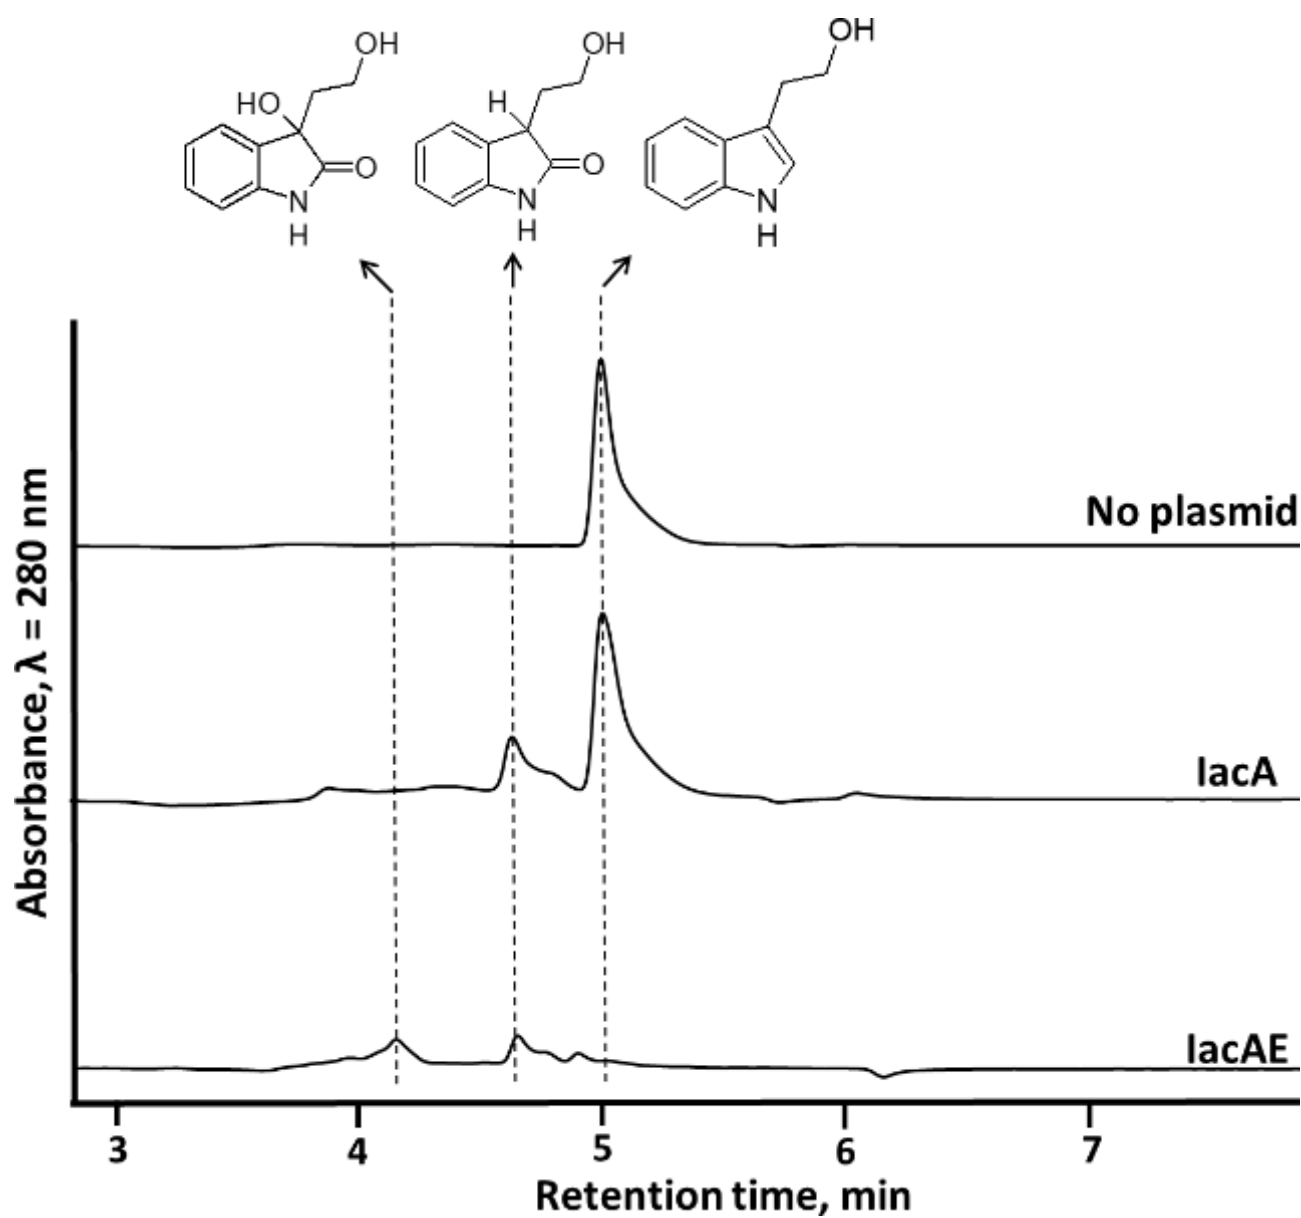

**Figure S7.** HPLC chromatograms of bioconversion products obtained by using *E. coli* cells expressing different combinations of IacA and IacE proteins and 3-(2-hydroxyethyl)indole as substrate.

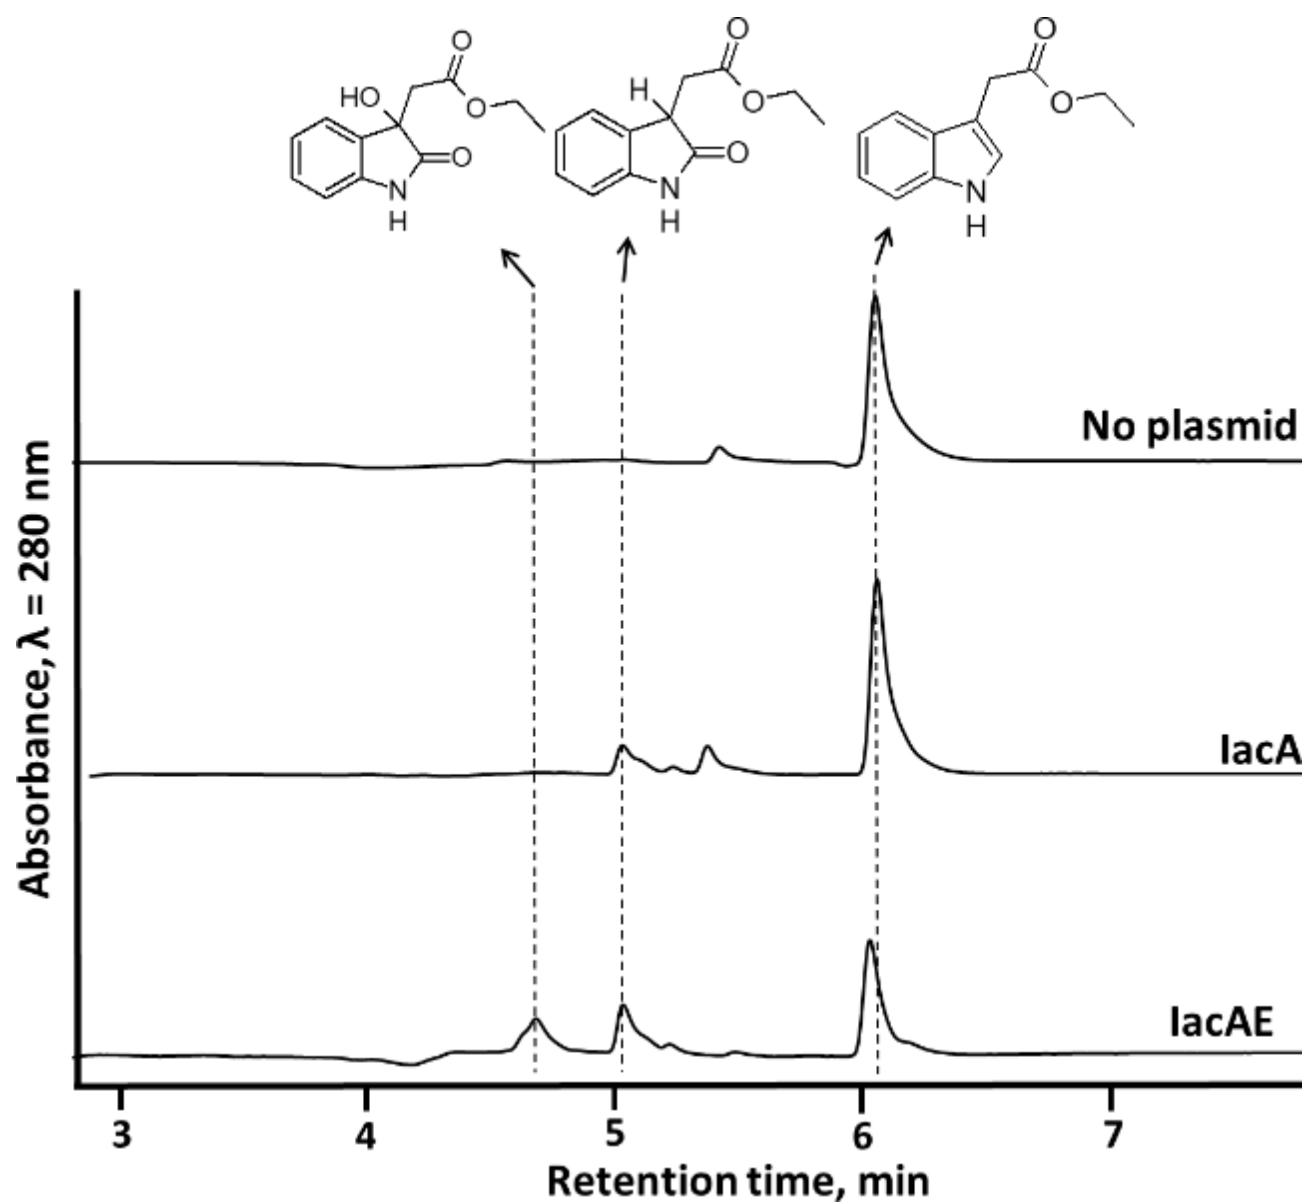

**Figure S8.** HPLC chromatograms of bioconversion products obtained by using *E. coli* cells expressing different combinations of IacA and IacE proteins and ethyl-3-indole-acetate as substrate.

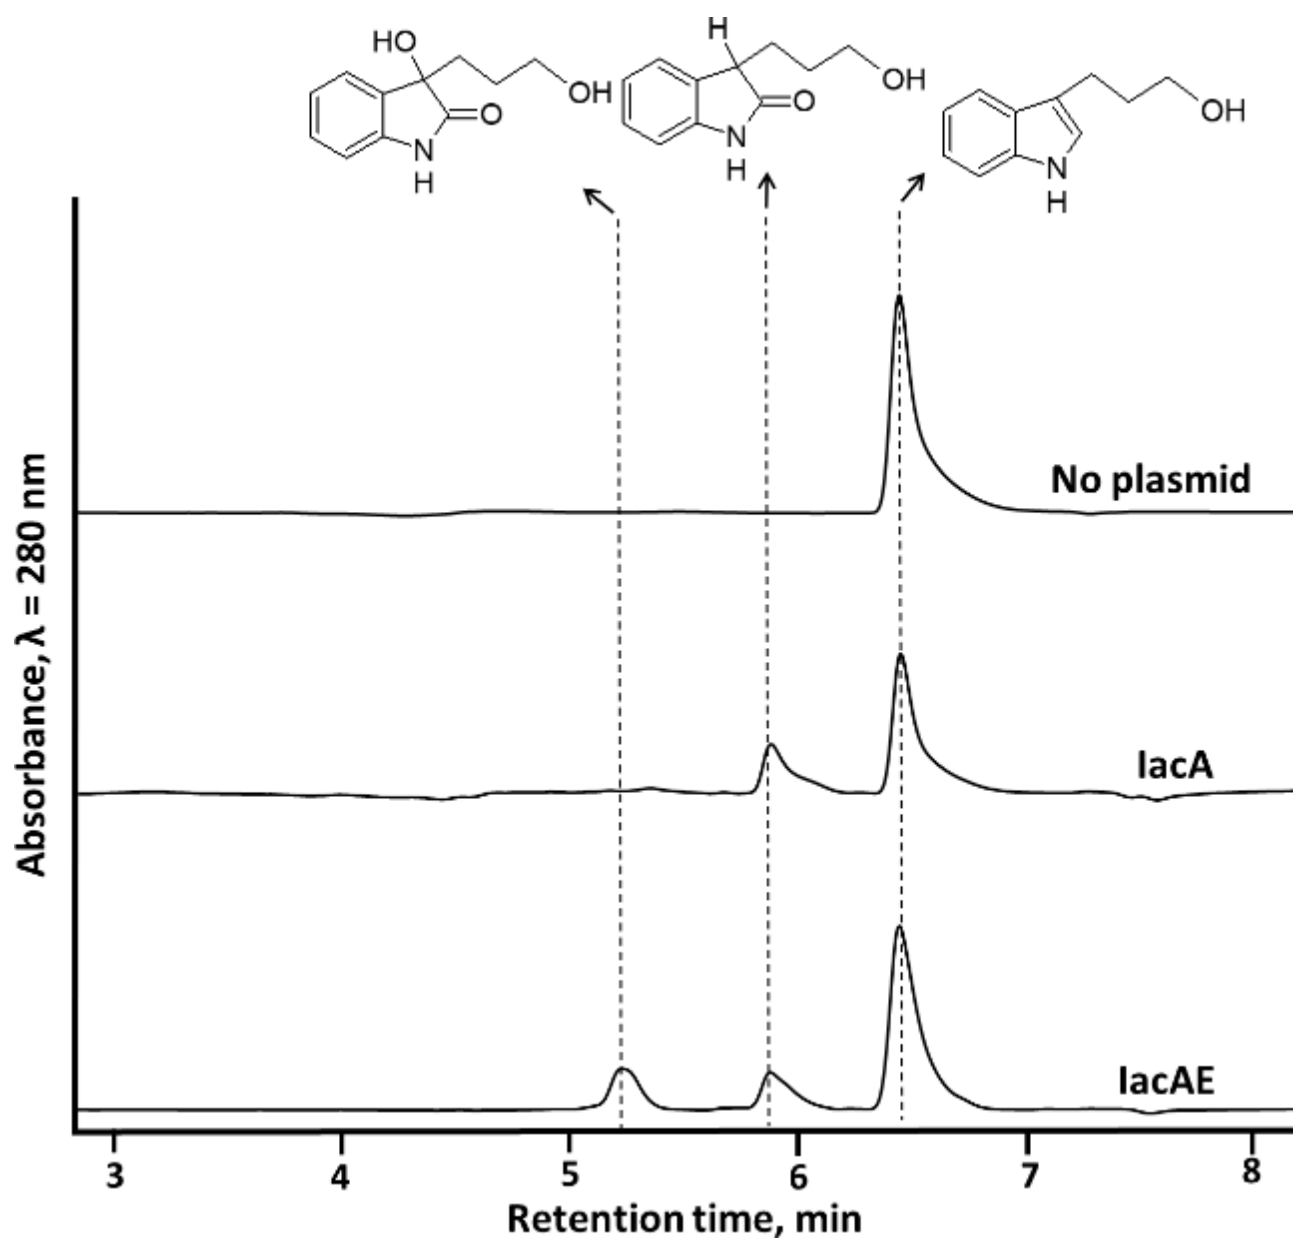

**Figure S9.** HPLC chromatograms of bioconversion products obtained by using *E. coli* cells expressing different combinations of lacA and lacE proteins and 3-(3-hydroxypropyl)indole as substrate.

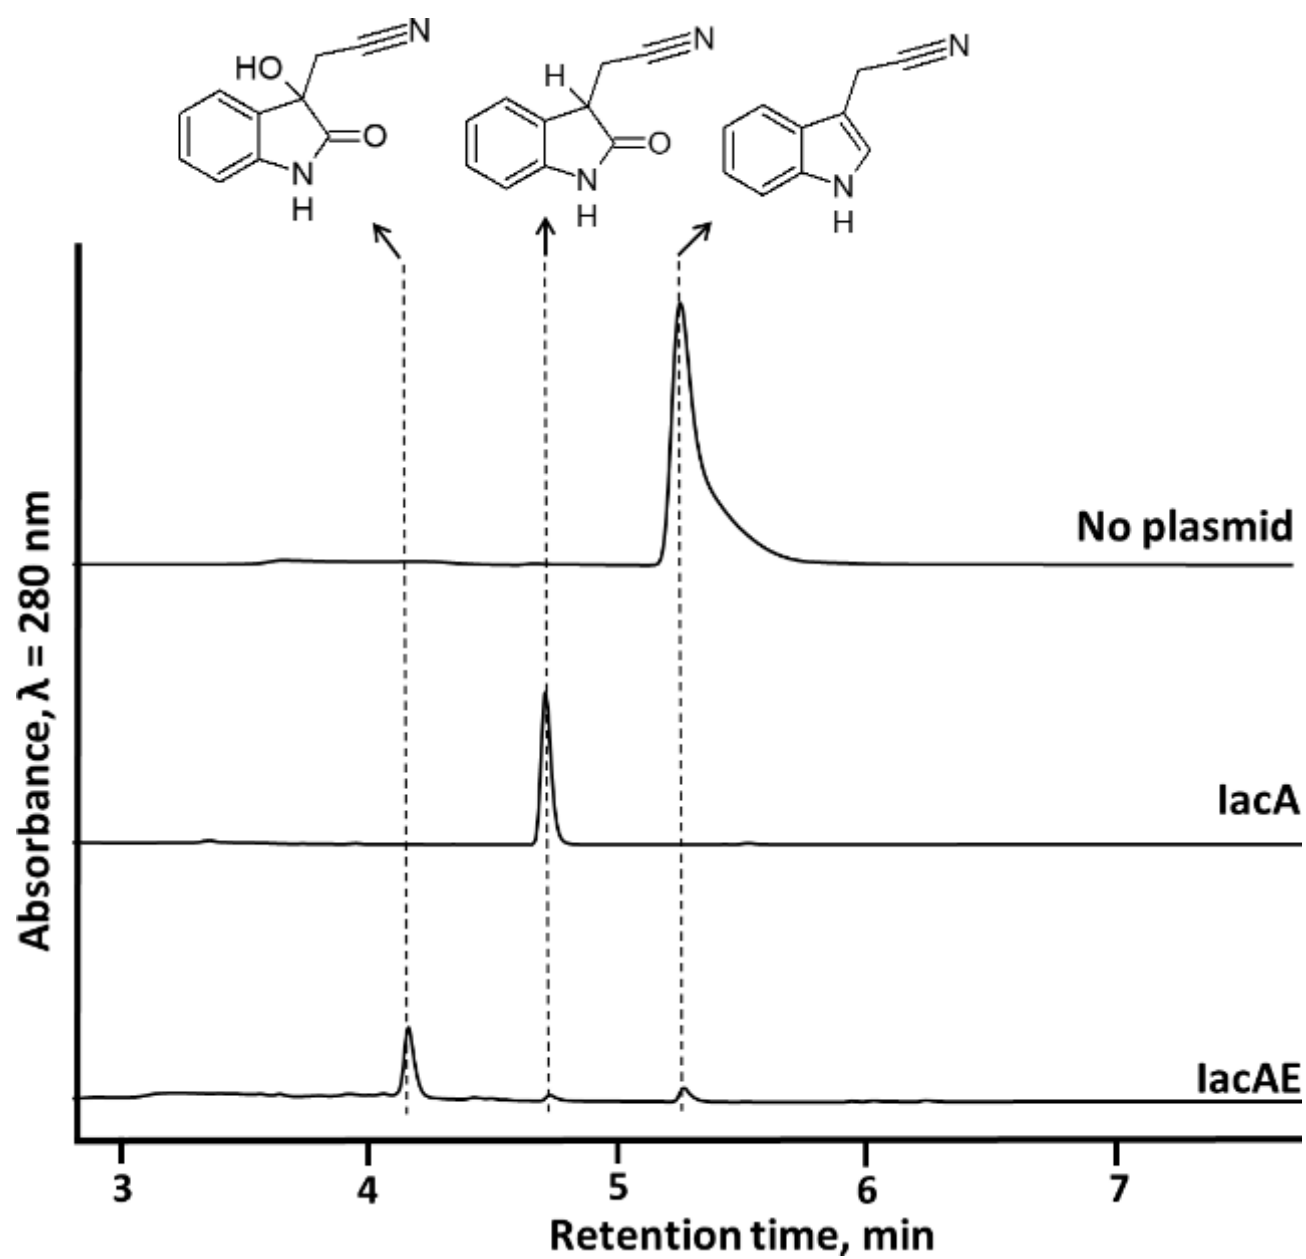

**Figure S10.** HPLC chromatograms of bioconversion products obtained by using *E. coli* cells expressing different combinations of IacA and IacE proteins and 3-indoleacetonitrile as substrate.

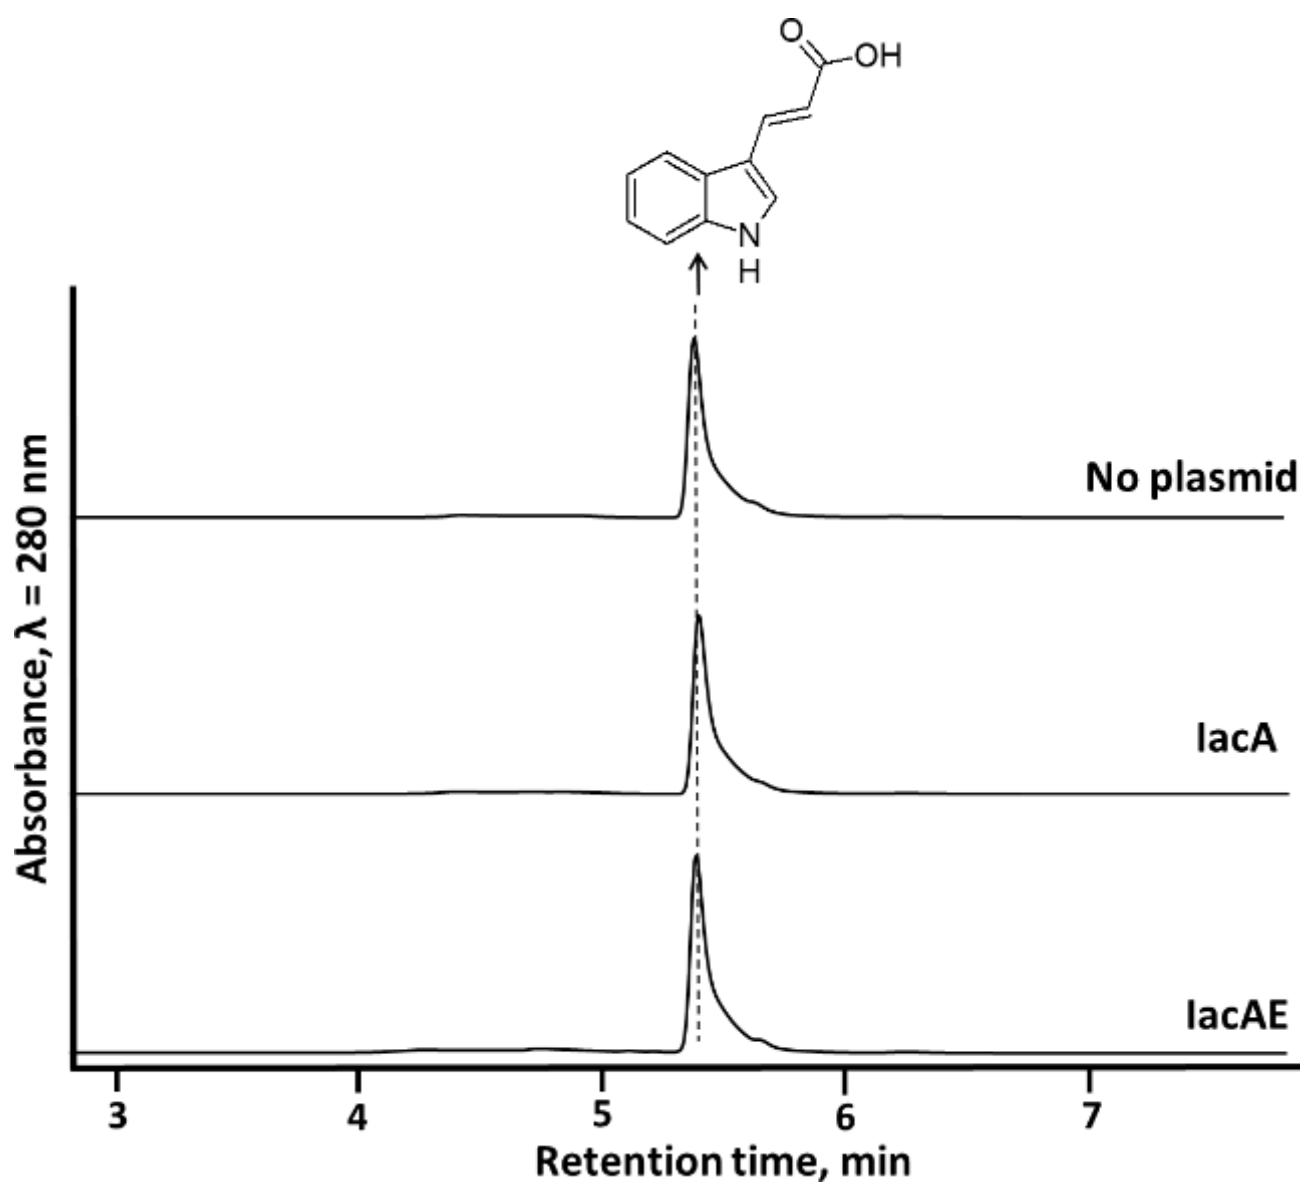

**Figure S11.** HPLC chromatograms of bioconversion products obtained by using *E. coli* cells expressing different combinations of IacA and IacE proteins and 3-indoleacrylic acid as substrate.

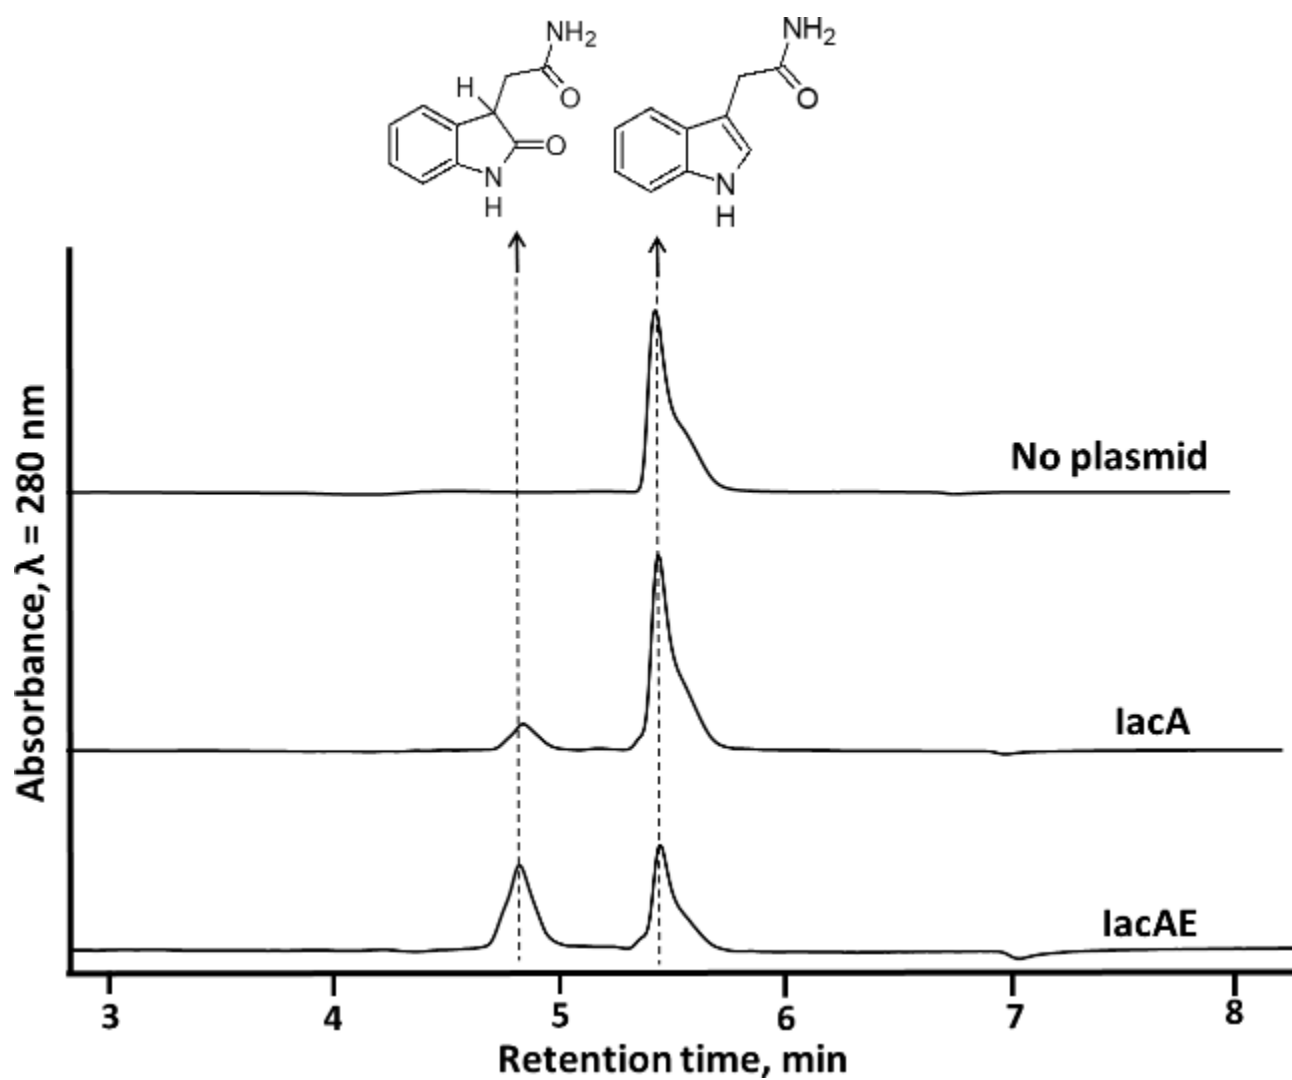

**Figure S12.** HPLC chromatograms of bioconversion products obtained by using *E. coli* cells expressing different combinations of IacA and IacE proteins and indole-3-acetamide as substrate.

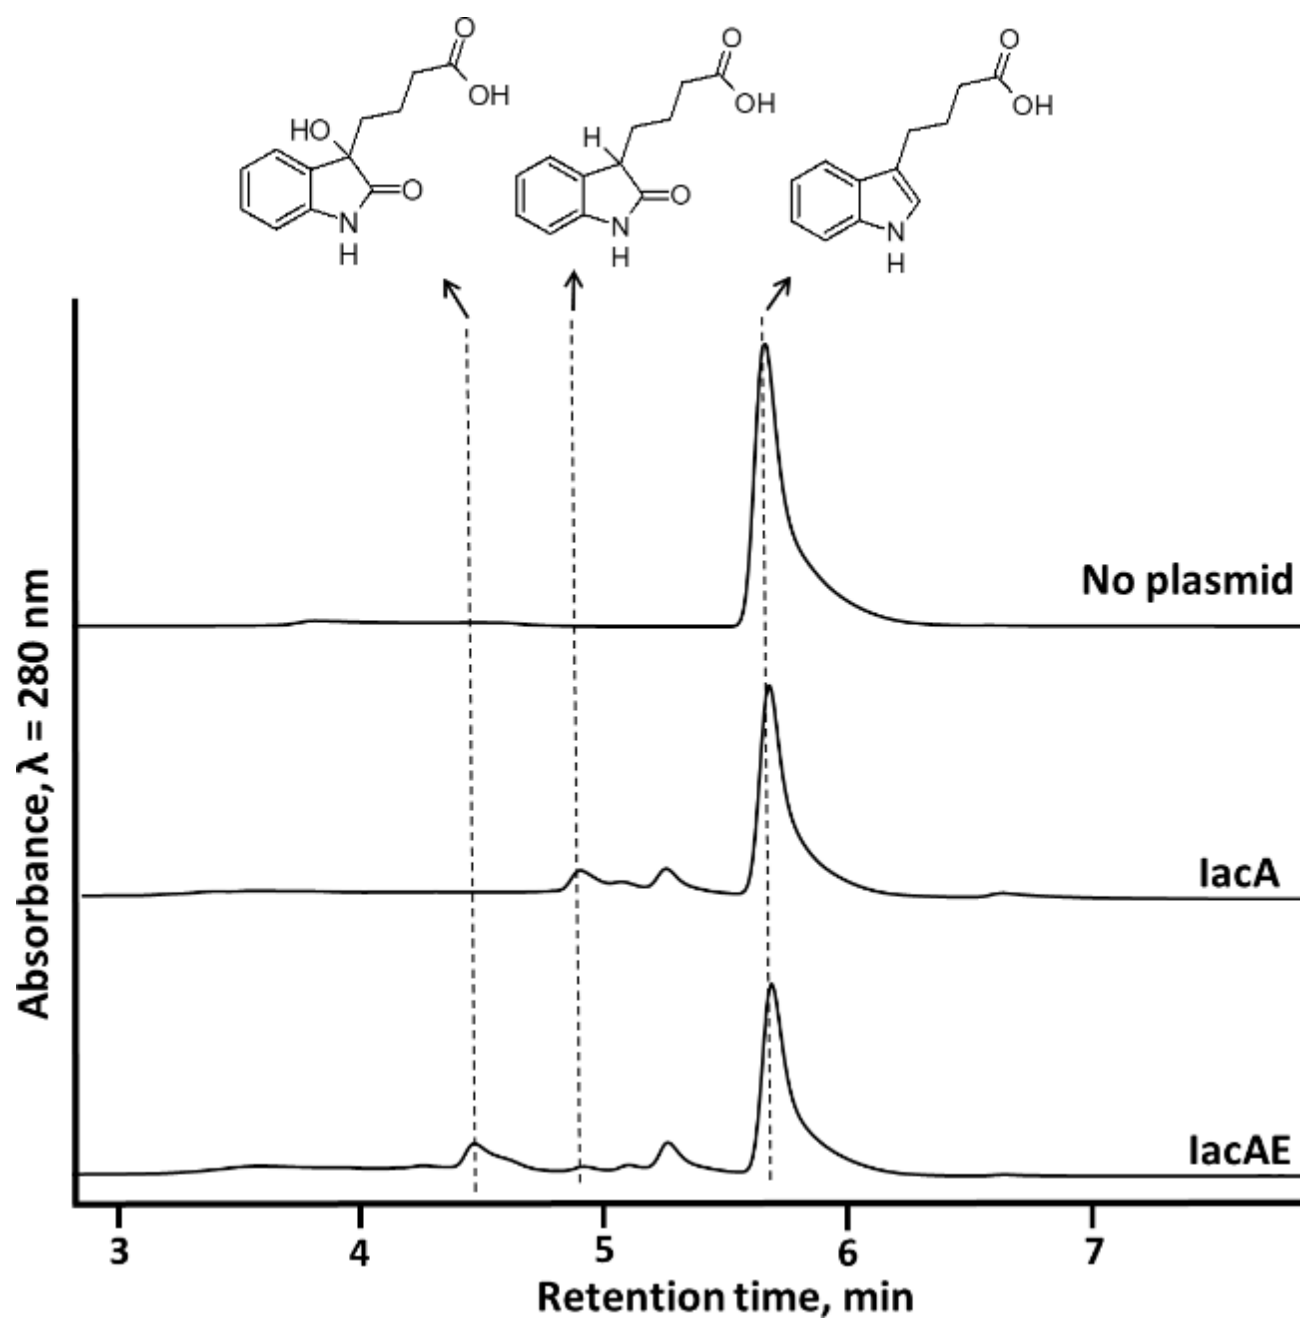

**Figure S13.** HPLC chromatograms of bioconversion products obtained by using *E. coli* cells expressing different combinations of IacA and IacE proteins and IBA as substrate.

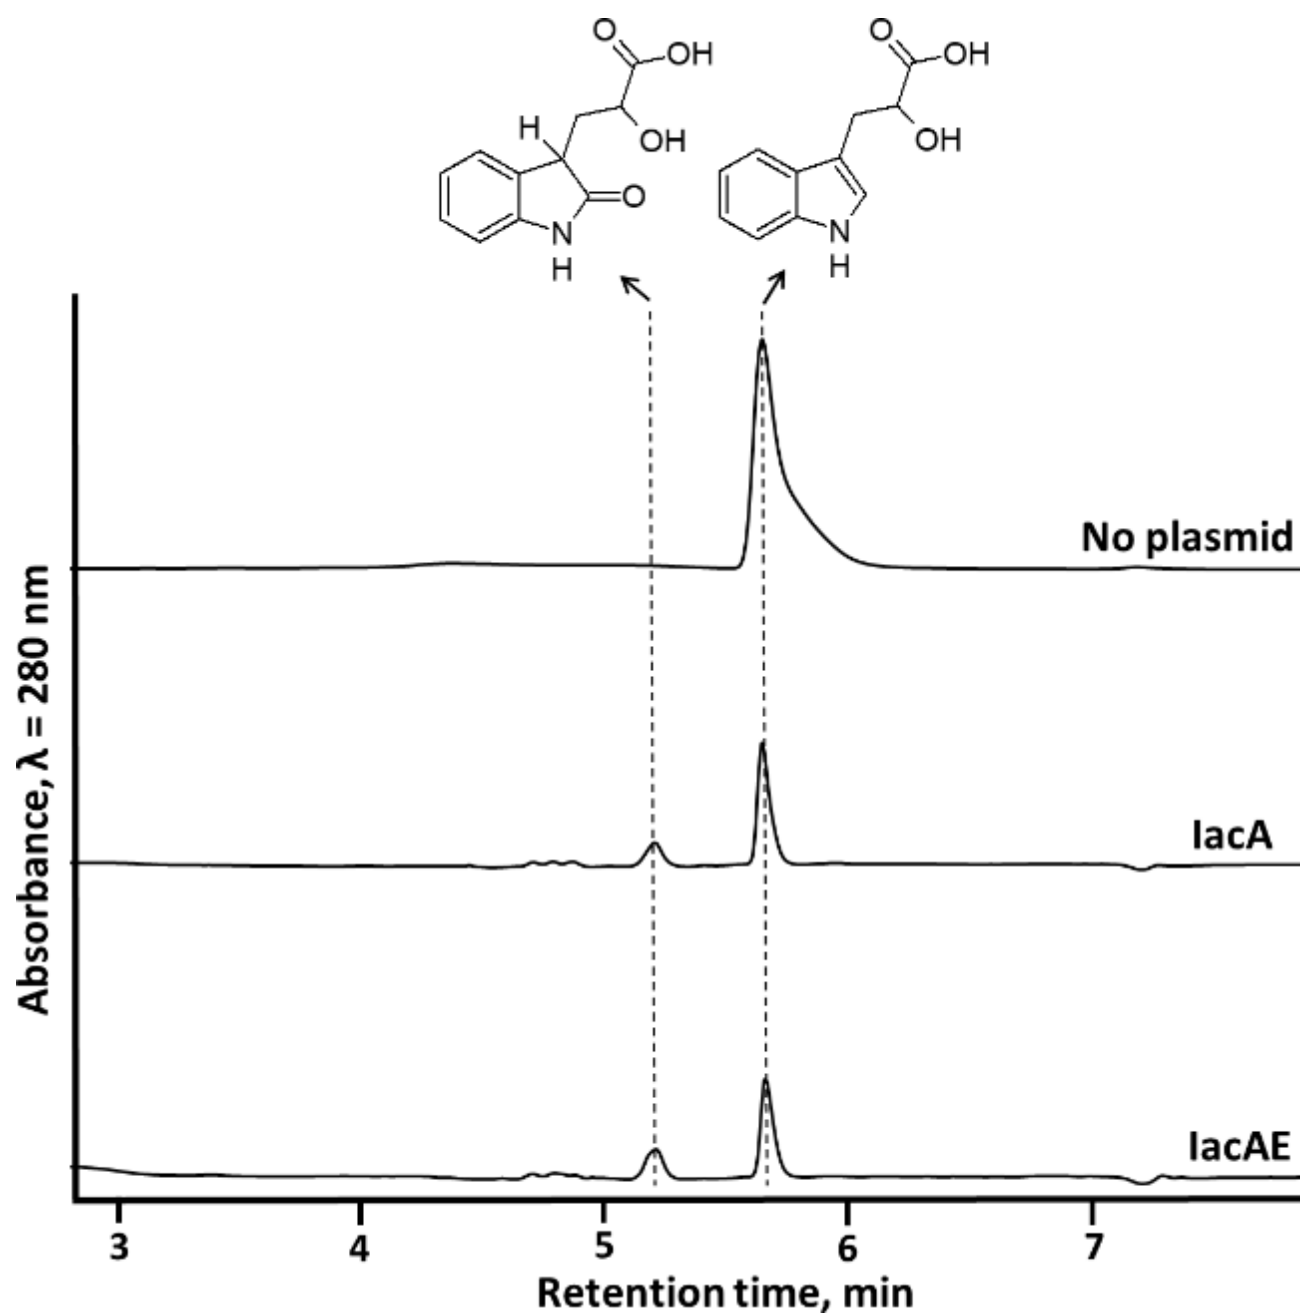

**Figure S14.** HPLC chromatograms of bioconversion products obtained by using *E. coli* cells expressing different combinations of IacA and IacE proteins and indole-3-lactic acid as substrate.

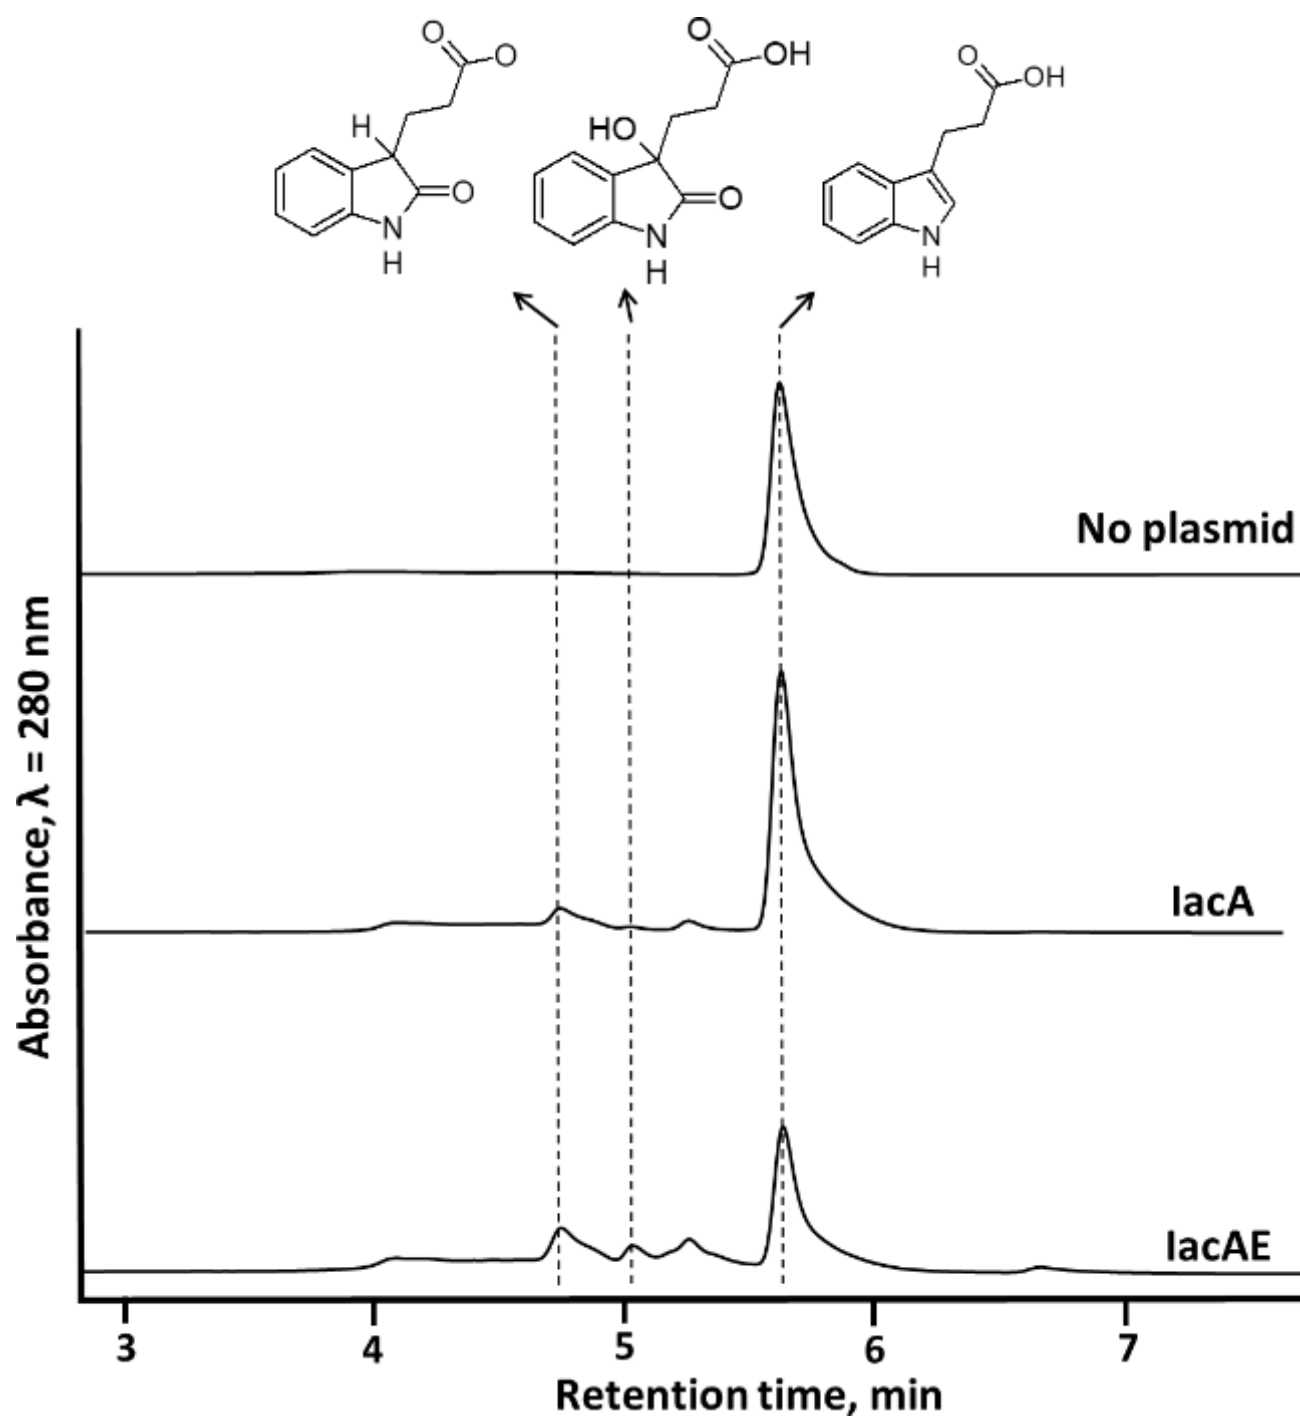

**Figure S15.** HPLC chromatograms of bioconversion products obtained by using *E. coli* cells expressing different combinations of LacA and LacE proteins and IPA as substrate.

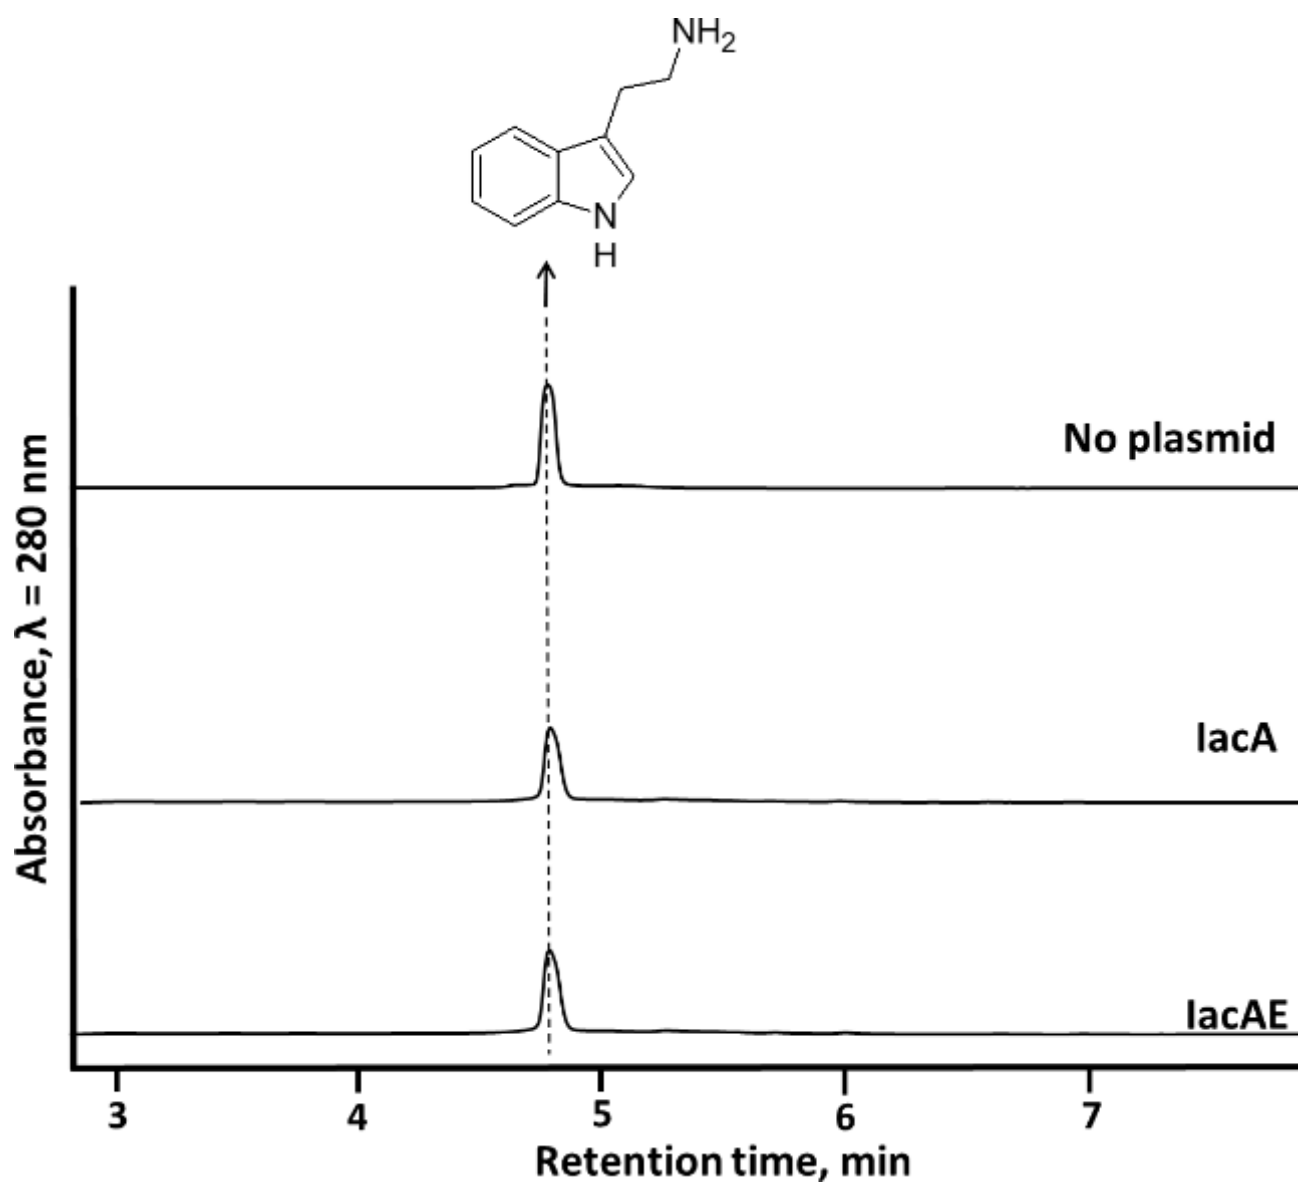

**Figure S16.** HPLC chromatograms of bioconversion products obtained by using *E. coli* cells expressing different combinations of IacA and IacE proteins and tryptamine as substrate.

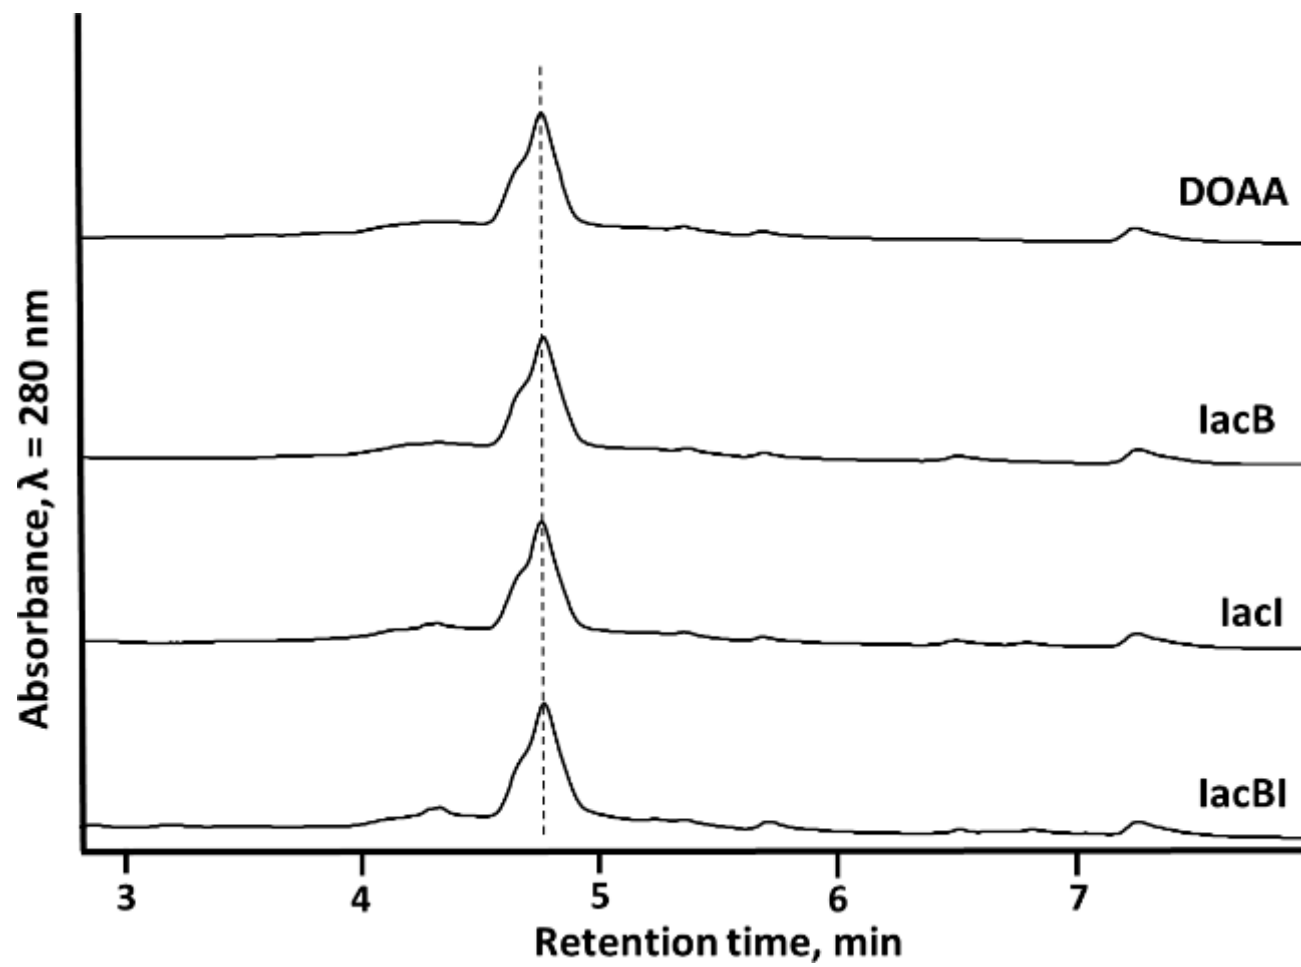

**Figure S17.** HPLC chromatograms of bioconversion products obtained by using *E. coli* cells expressing different combinations of IacB and IacI proteins and DOAA as substrate.

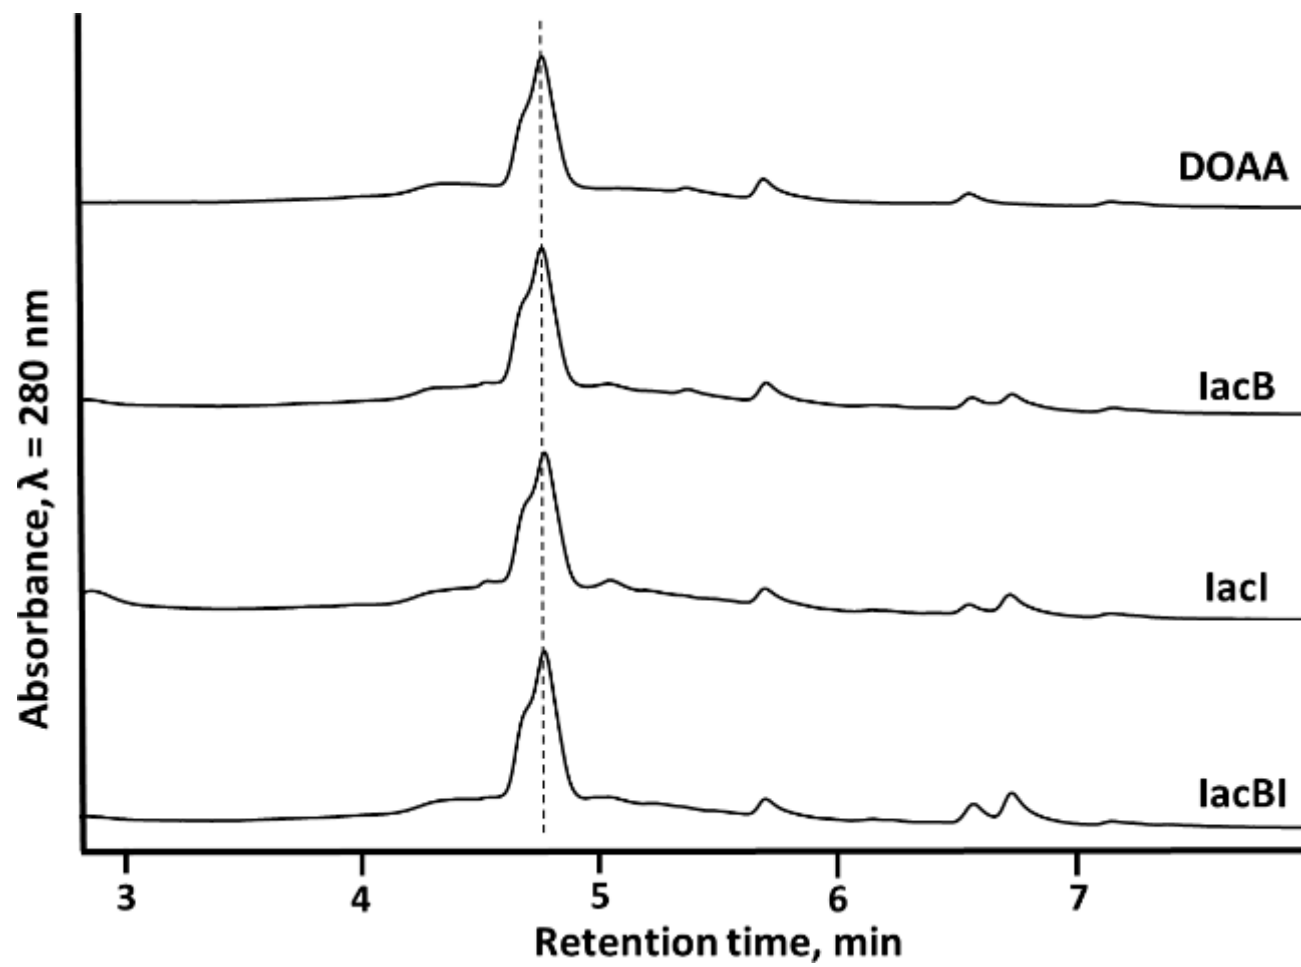

**Figure S18.** HPLC chromatograms of *in vitro* reaction products obtained by using lacB and lacI proteins and DOAA as substrate.

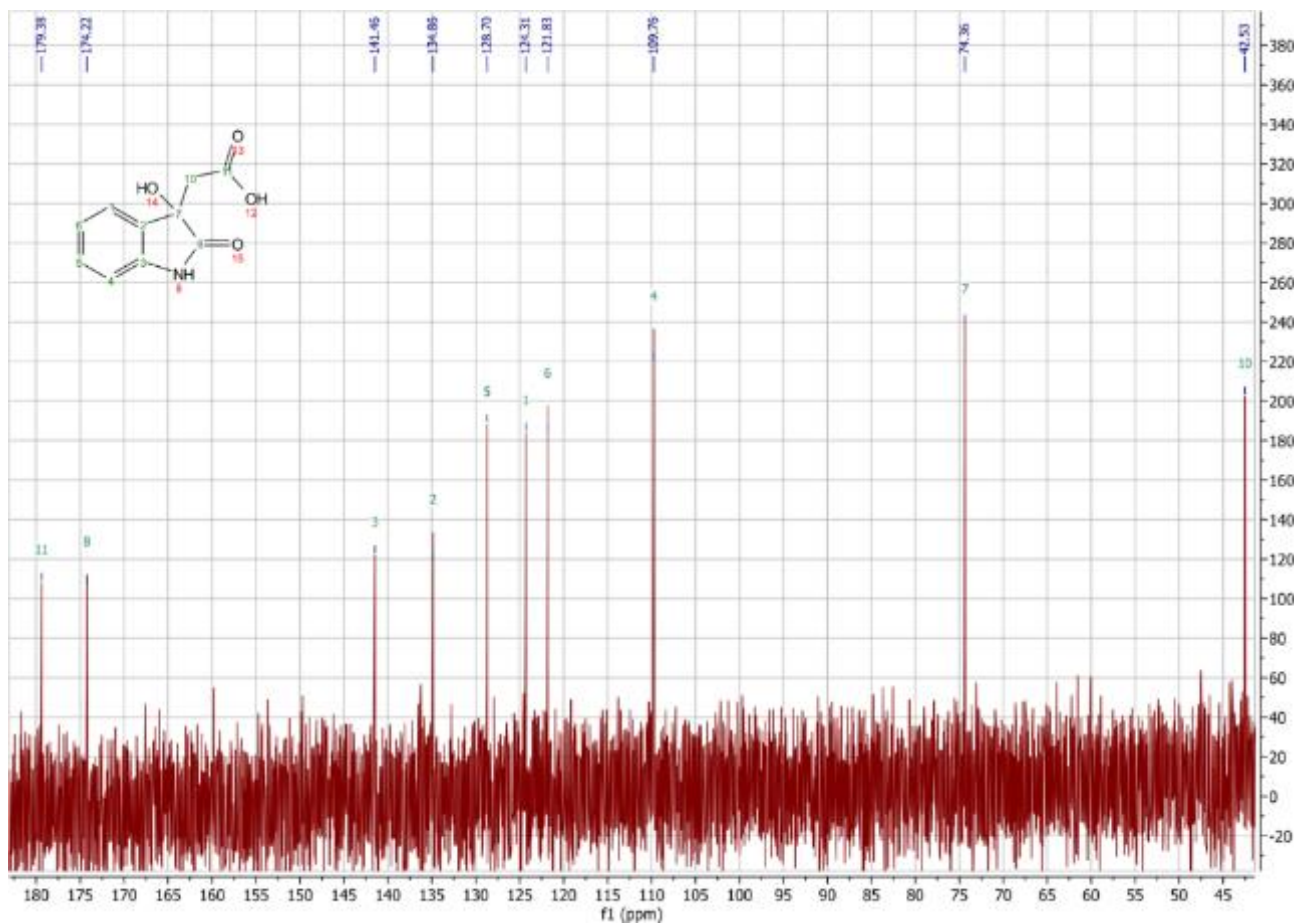

**Figure S19.**  $^{13}\text{C}$  NMR spectrum of DOAA obtained by transforming IAA with *E. coli* cells carrying IacAE proteins.

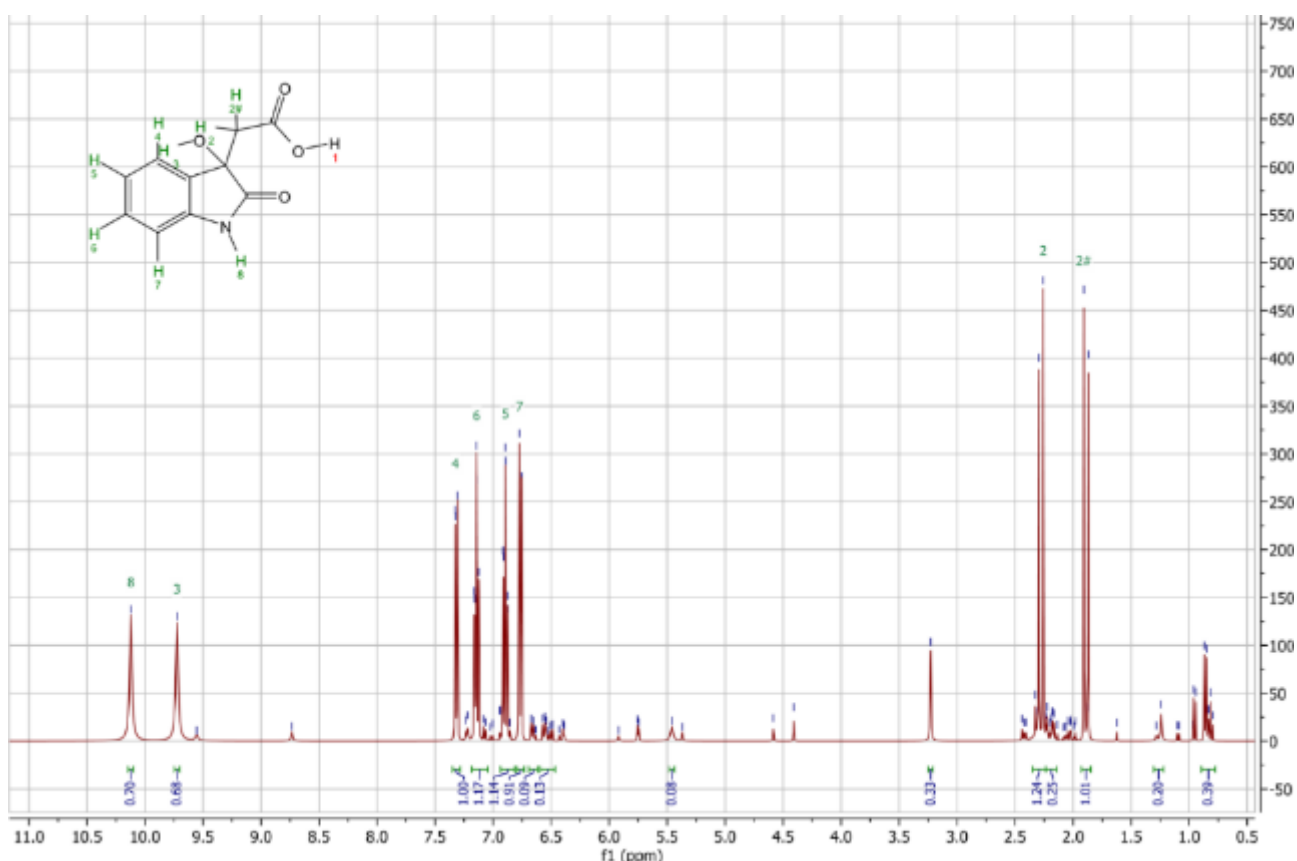

**Figure S20.**  $^1\text{H}$  NMR spectrum of DOAA obtained by transforming IAA with *E. coli* cells carrying IacAE proteins.

>IacE

```

MSNRVVLITG  AARGLGAVVA  RRFHEAGYKV  ALADIAVEAA  KTLARELSED  GTSACAIKLD
VSSKADFEAA  RDALLERWDA  IDAIVNNAGA  SKVIPVMEIT  AEQFDQVIDI  NLRSVLFGCQ
VFGQYFAGRG  AGRIVNIASL  AGQNGGSATG  AHVAAAKGGA  ITLTKVFARD  LAPHGVTVNA
ISPGPLDLPI  VHESVPADKL  QKVIAGIPVG  KLGSAAYIAD  VAVLLASADA  YFANGACWDV  NGGLYMR

```

NAD(P)H binding motif

Conserved alanine

Conserved glycine

Conserved asparagine (binding of nicotinamide)

NNAG motif (Stabilization of beta sheets)

Catalytic tetrad

Catalytic site

PG motif (Direction of reaction)

**Figure S21.** Conserved sequence motifs in IacE as predicted by SDRED database.

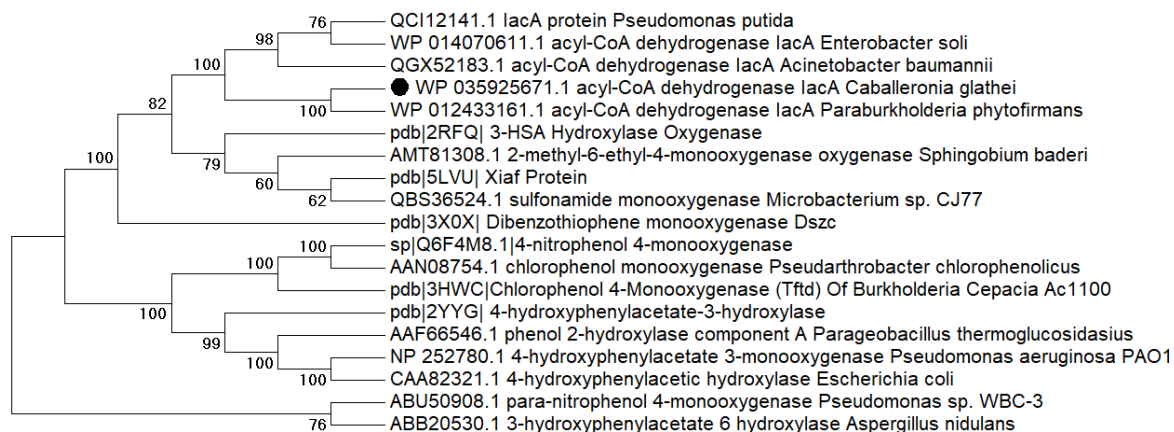

**Figure S22.** Phylogenetic tree of lacA. Amino acid sequences of group D flavin-dependent oxygenase were picked according to [55]. Sequences were aligned by using the ClustalW algorithm, a maximum-likelihood tree was constructed by using MEGA7 software [56] with 1000 bootstrap replications. The percentage of replicate trees in which the associated taxa clustered together in the bootstrap test are shown.

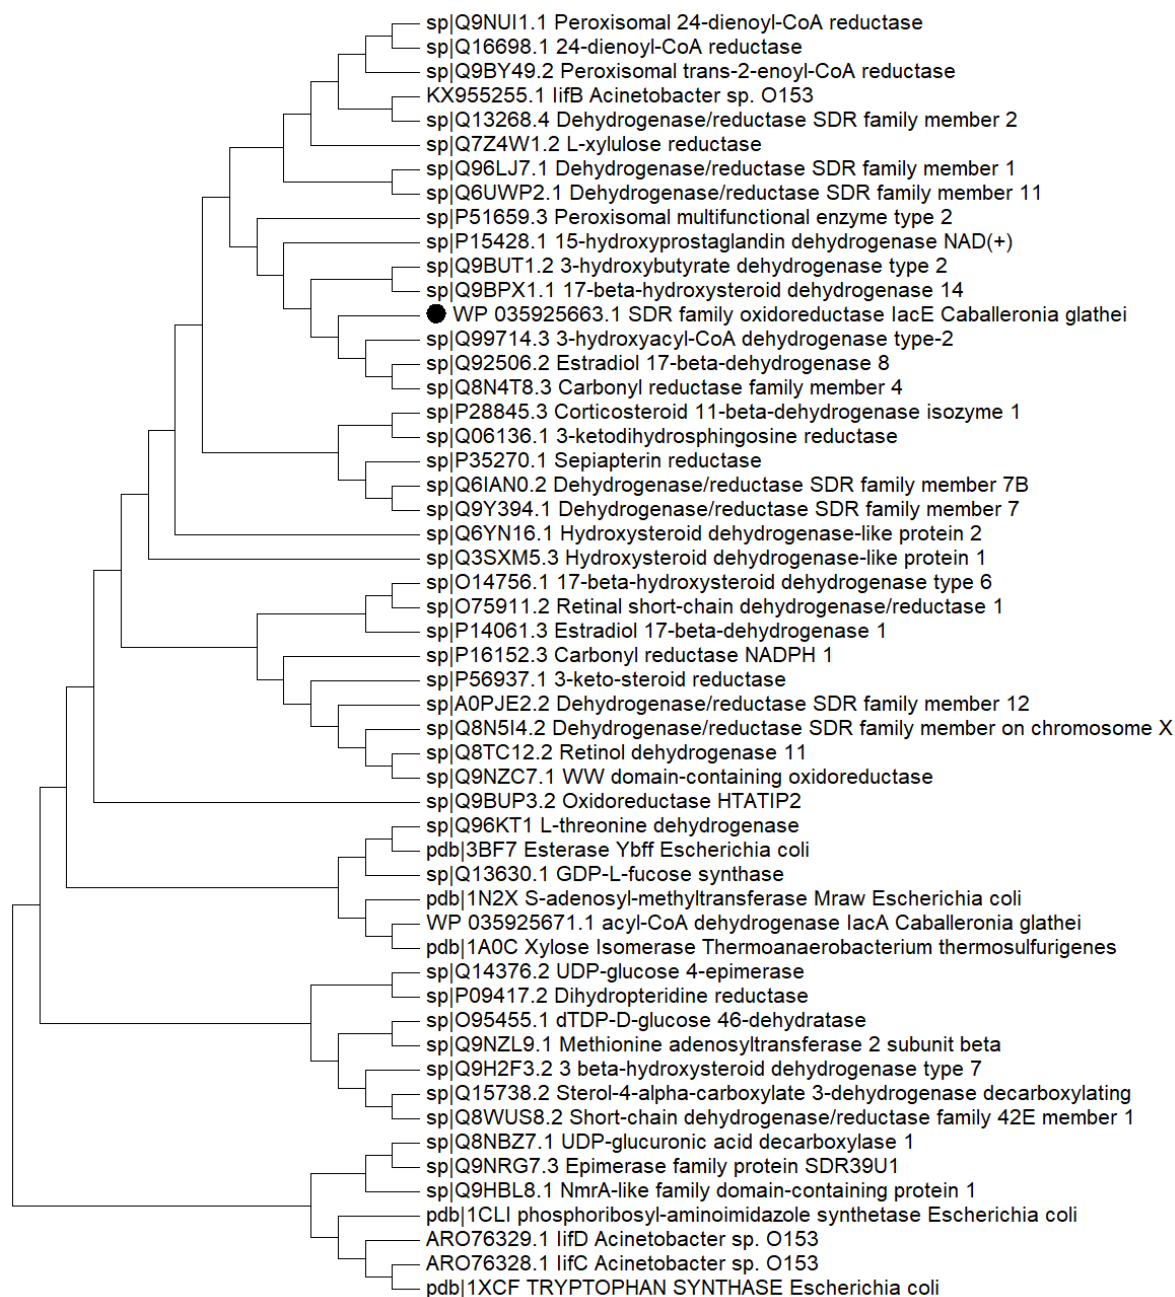

**Figure S23.** Phylogenetic tree of IacE. Amino acid sequences of short-chain dehydrogenases/reductases (SDR) were picked from each SDR family according to [57]. Sequences were aligned by using the ClustalW algorithm, a maximum-likelihood tree was constructed by using MEGA7 software [56] with 1000 bootstrap replications.
